# Supplementary material for: Hairy Fluorescent Nanospheres Based on Polyelectrolyte Brush for Highly Sensitive Determination of Cu(II)
Source: PubMed Central journal article supplement (PMC7182828; doi:10.3390/polym12030577), 2020-03-05
Supplement: polymers-12-00577-s001.pdf [file polymers-12-00577-s001.pdf]

*Article*

# Hairy Fluorescent Nanospheres Based on Polyelectrolyte Brush for Highly Sensitive Determination of Cu(II)

Qiaoling Wang <sup>1</sup>, Kaimin Chen <sup>1,\*</sup>, Yi Qu <sup>1,\*</sup>, Kai Li <sup>1</sup>, Ying Zhang <sup>2</sup> and Enyu Fu <sup>1</sup>

<sup>1</sup> College of Chemistry and Chemical Engineering, Shanghai University of Engineering Science, Shanghai 201620, China; woodsues@outlook.com (Q.W.); 18301939658@163.com (K.L.); fuenyu1234@163.com (E.F.)

<sup>2</sup> School of Chemical Engineering, East China University of Science and Technology, Shanghai 200237, China; zy12fearless@163.com

\* Correspondence: kmchen@sues.edu.cn (K.C.); quyi@fudan.edu.cn (Y.Q.)

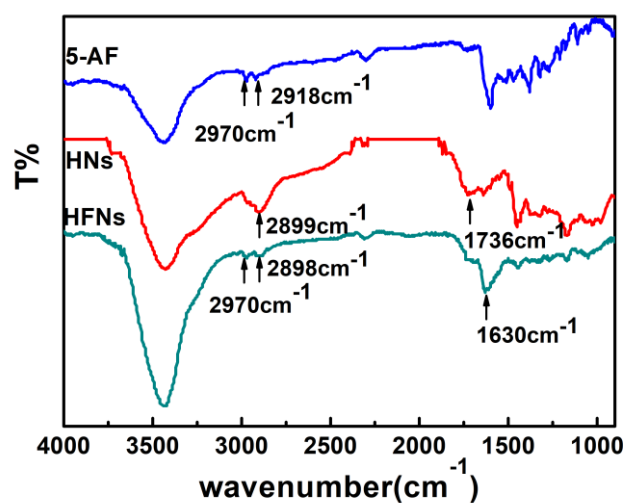

**Figure S1.** FTIR absorption spectra of 5-AF, hairy nanospheres and hairy fluorescent nanospheres

Surface functionalization of HNs and 5-AF were characterized with Fourier transform infrared spectroscopy (As shown in the figure s1). For 5-aminofluorescein, there is O-H stretching vibration at 3600-3100  $\text{cm}^{-1}$  and C=C exists at 2000-1650  $\text{cm}^{-1}$  with broad frequency absorption. For HNs, the C=O group is at 1736  $\text{cm}^{-1}$  and the obvious hydroxyl polymerization signal exists at 3200-2500  $\text{cm}^{-1}$ . The energy band near 1630  $\text{cm}^{-1}$  corresponds to the bending of the amine NH, the stretching vibration of NH at 3650-3200  $\text{cm}^{-1}$  and the internal vibration of the amide bond at about 1380  $\text{cm}^{-1}$ , which indicates successful coupling for 5-AF.
